# Supplementary material for: Quantitative characterization of histone post-translational modifications using a stable isotope dimethyl-labeling strategy
Source: Royal Society of Chemistry journal article supplement (doi:10.1039/c5ay00120j), 2015-01-01
Supplement: c5ay00120j1.pdf [file c5ay00120j1.pdf]

### Supplemental Information

**Fig. S1** MALDI-TOF-MS of peptide ARTKQTARK before (A) and after (B) trypsin digestion, and peptide  $(\text{CH}_3)_2\text{-ARTK}(\text{CH}_3)_2\text{QTARK}(\text{CH}_3)_2$  before (C) and after (D) trypsin digestion.

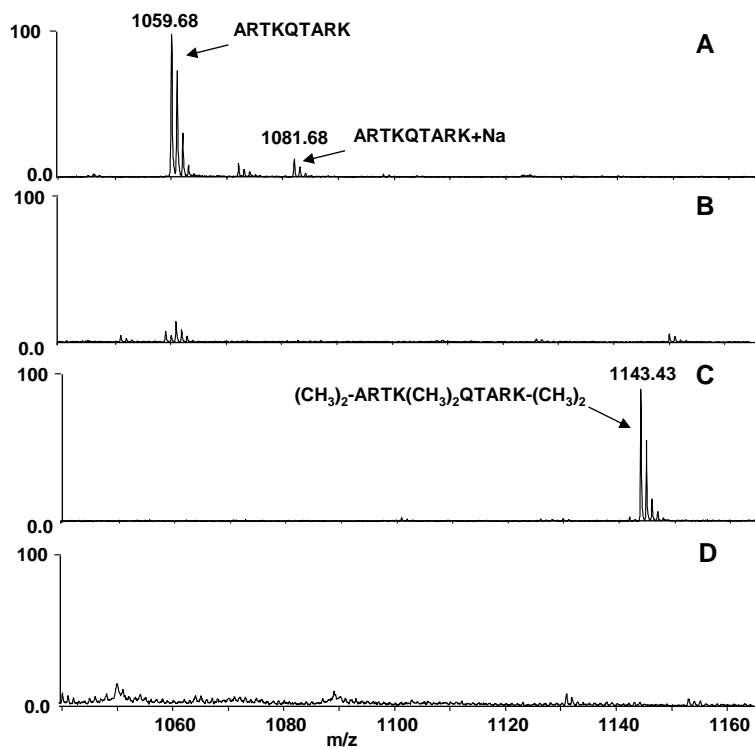

**Fig. S2** MS/MS of QTAR (A) and TK(CH<sub>3</sub>)<sub>2</sub>QTAR (B). MALDI-TOF-MS of peptide TK(CH<sub>3</sub>)<sub>2</sub>QTAR without (C) or with (D) dimethyl labeling.

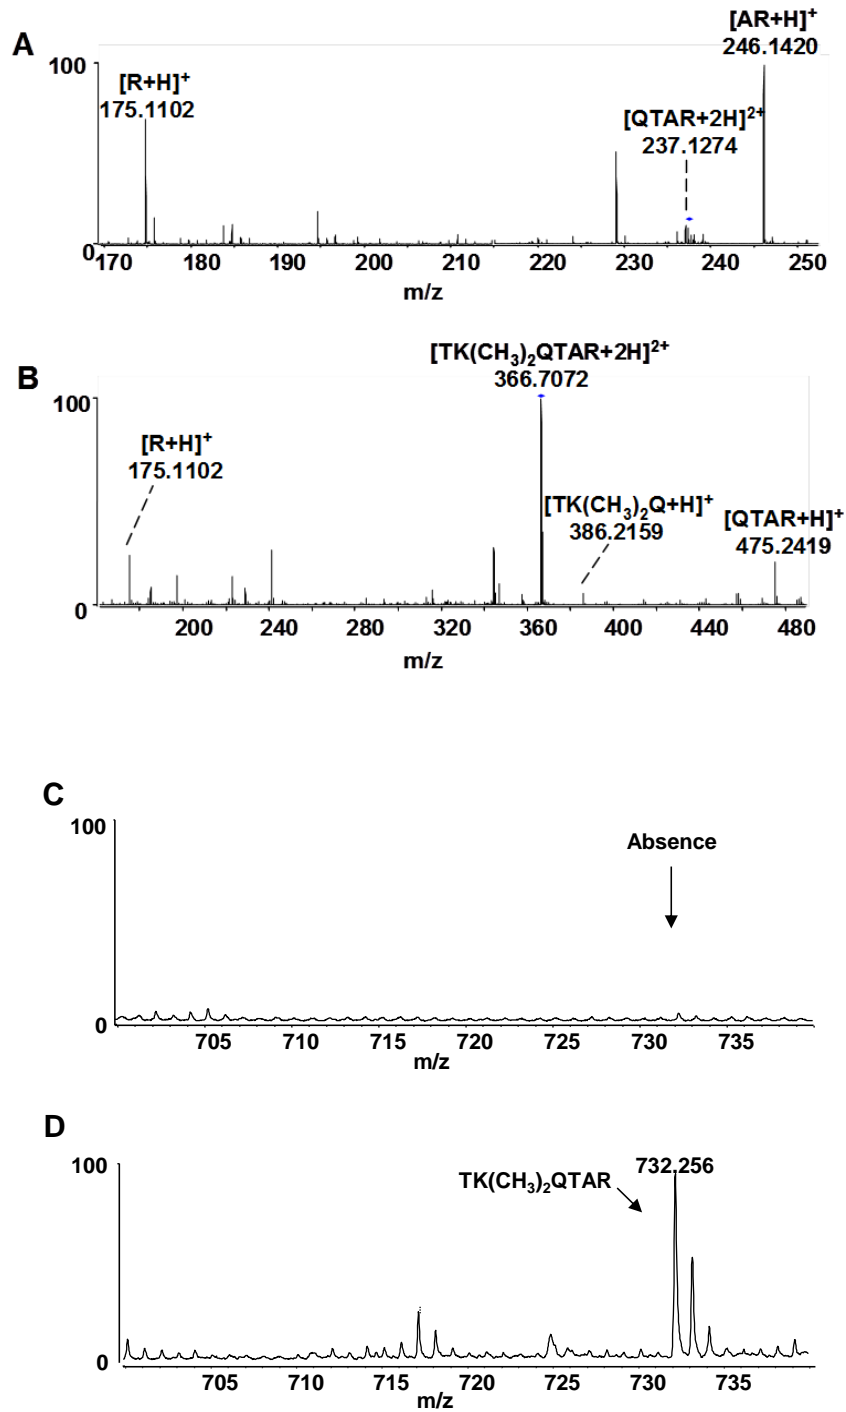

**Fig. S3** The quantitative analysis of Lysine modification and non-modification at the same site.

(a) (A) A MS single-scan spectrum of YQK(Me)STELLIR (+632.87 Da, 2+) and YQK(CHD<sub>2</sub>)<sub>2</sub>STELLIR (+641.89Da, 2+) from H3 (residues 54-63). (B) MS/MS of YQK(Me)STELLIR. (C) MS/MS of YQK(CHD<sub>2</sub>)<sub>2</sub>STELLIR.

(b) (A) A MS single-scan spectrum of SAPATGGVK(Me<sub>2</sub>)K(CHD<sub>2</sub>)<sub>2</sub>PHR (+683.42 Da, 2+) and SAPATGGVK(CHD<sub>2</sub>)<sub>2</sub>K(CHD<sub>2</sub>)<sub>2</sub>PHR (+685.43 Da, 2+) from H3 (residues 28-40). (B) MS/MS of SAPATGGVK(Me<sub>2</sub>)K(CHD<sub>2</sub>)<sub>2</sub>PHR. (C) MS/MS of SAPATGGVK(CHD<sub>2</sub>)<sub>2</sub>K(CHD<sub>2</sub>)<sub>2</sub>PHR.

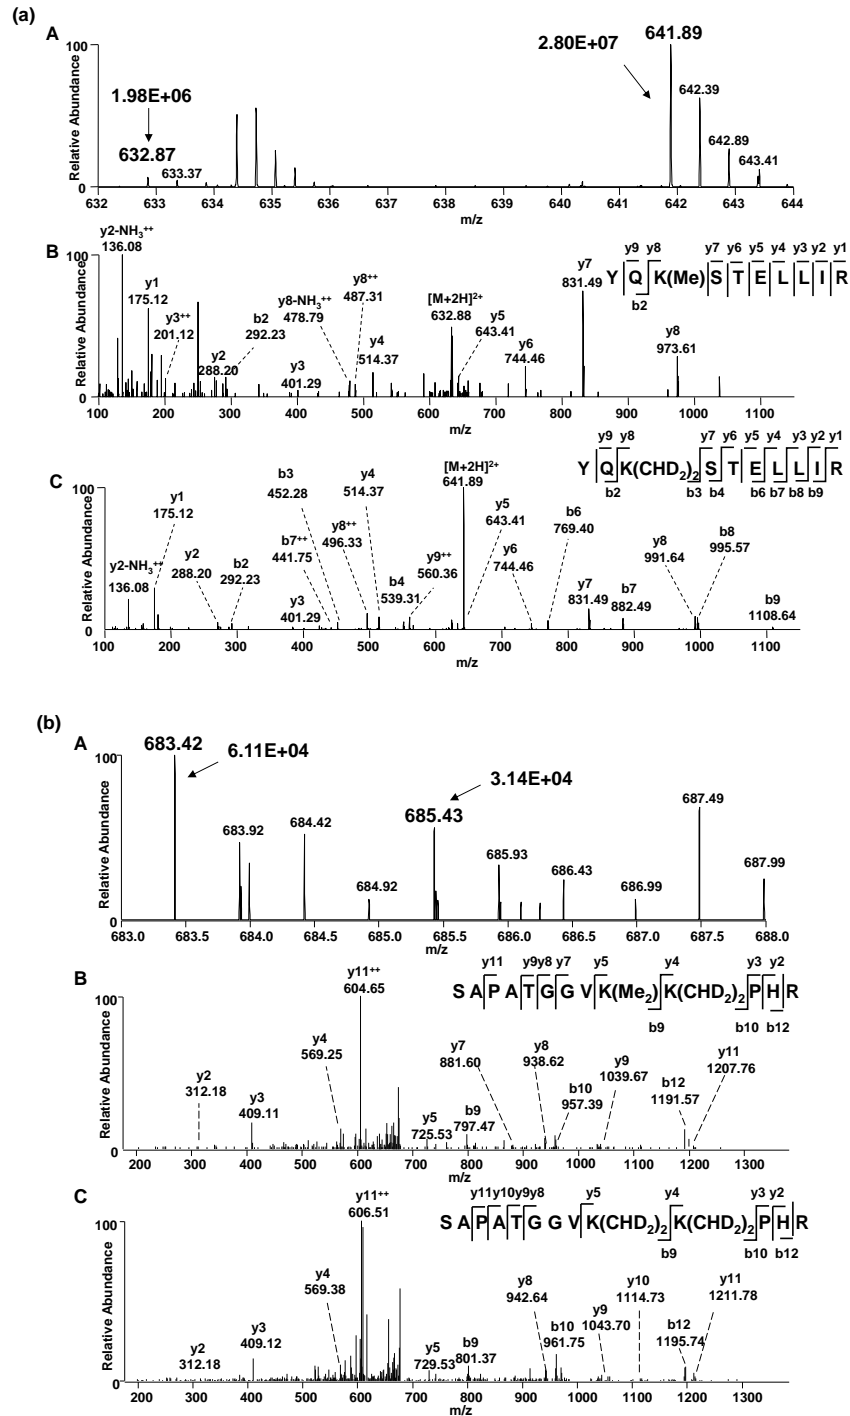

Fig.S4 MS/MS spectra for the modified peptides in Table 1.

Fig. S4A

**GK<sub>Ac</sub>GGK<sub>Ac</sub>GLGK<sub>Ac</sub>GGAK<sub>Ac</sub>R**

**Monoisotopic mass of neutral peptide Mr(calc): 1437.81**

**Variable modifications:**

**K2:** Acetyl (K); **K5:** Acetyl (K); **K9:** Acetyl (K); **K13:** Acetyl (K)

**Ions Score:** 71 **Expect:** 2.4e-006

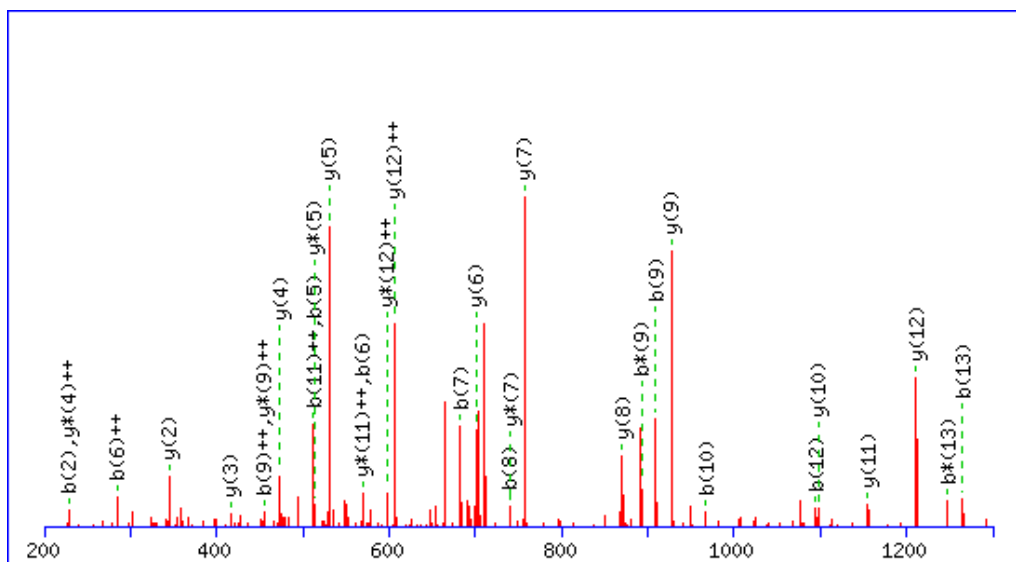

Fig. S4B

**GK<sub>(CHD)2</sub>GGK<sub>Ac</sub>GLGK<sub>Ac</sub>GGAK<sub>Ac</sub>R**

**Monoisotopic mass of neutral peptide Mr(calc): 1427.85**

**Variable modifications:**

**K2:** Dimethyl:2H(4) (K); **K5:** Acetyl (K); **K9:** Acetyl (K); **K13:** Acetyl (K)

**Ions Score:** 64 **Expect:** 1.3e-005

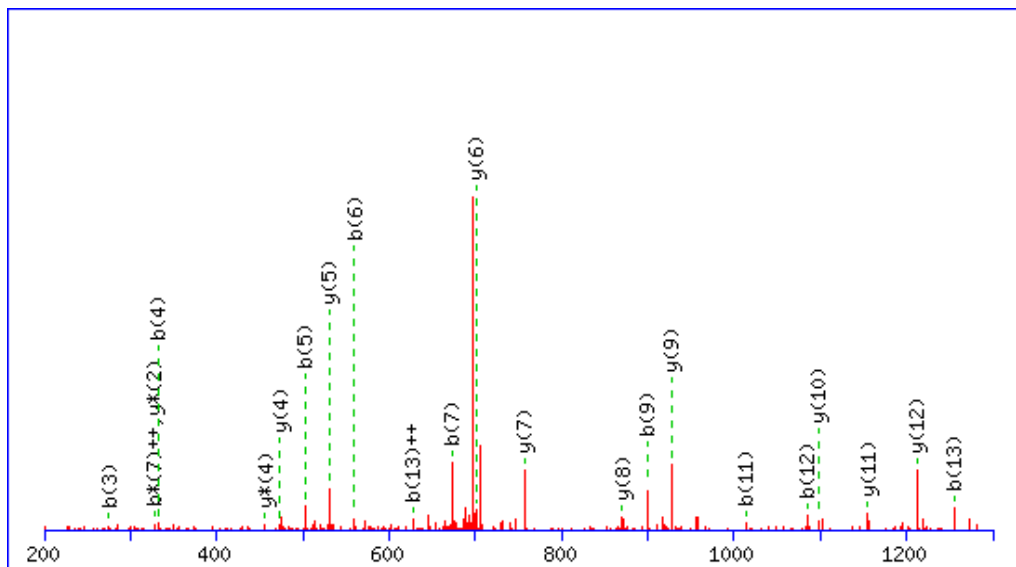

Fig. S4C

**GK<sub>Ac</sub>GGK<sub>(CHD2)2</sub>GLGK<sub>Ac</sub>GGAK<sub>Ac</sub>R**

Monoisotopic mass of neutral peptide Mr(calc): 1427.85

Variable modifications:

**K2:** Acetyl (K); **K5:** Dimethyl:2H(4) (K); **K9:** Acetyl (K); **K13:** Acetyl (K)

Ions Score: 54    Expect: 0.00012

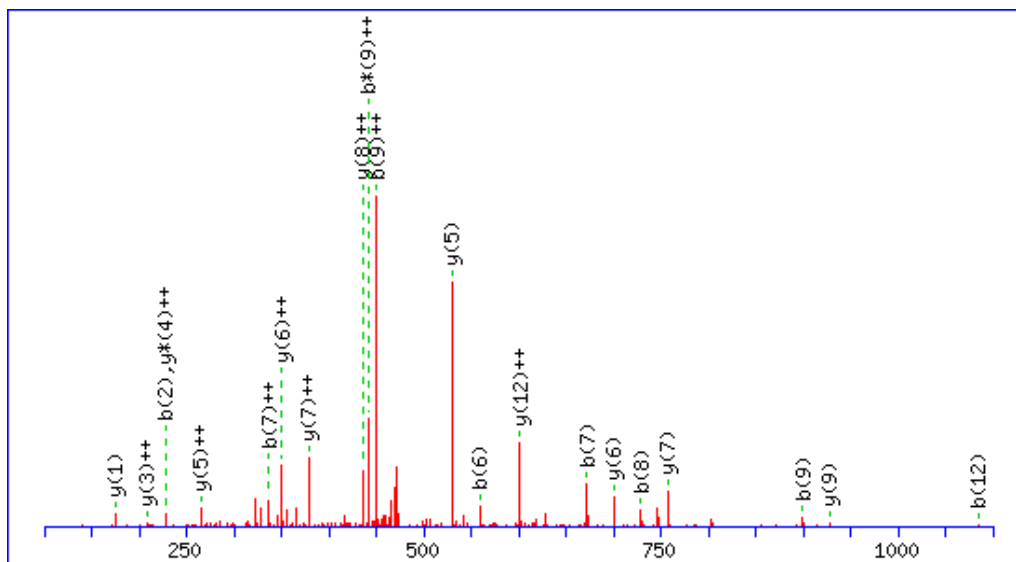

Fig. S4D

**GK<sub>Ac</sub>GGK<sub>Ac</sub>GLGK<sub>(CHD2)2</sub>GGAK<sub>Ac</sub>R**

Monoisotopic mass of neutral peptide Mr(calc): 1427.85

Variable modifications:

**K2:** Acetyl (K); **K5:** Acetyl (K); **K9:** Dimethyl:2H(4) (K); **K13:** Acetyl (K)

Ions Score: 51    Expect: 0.00016

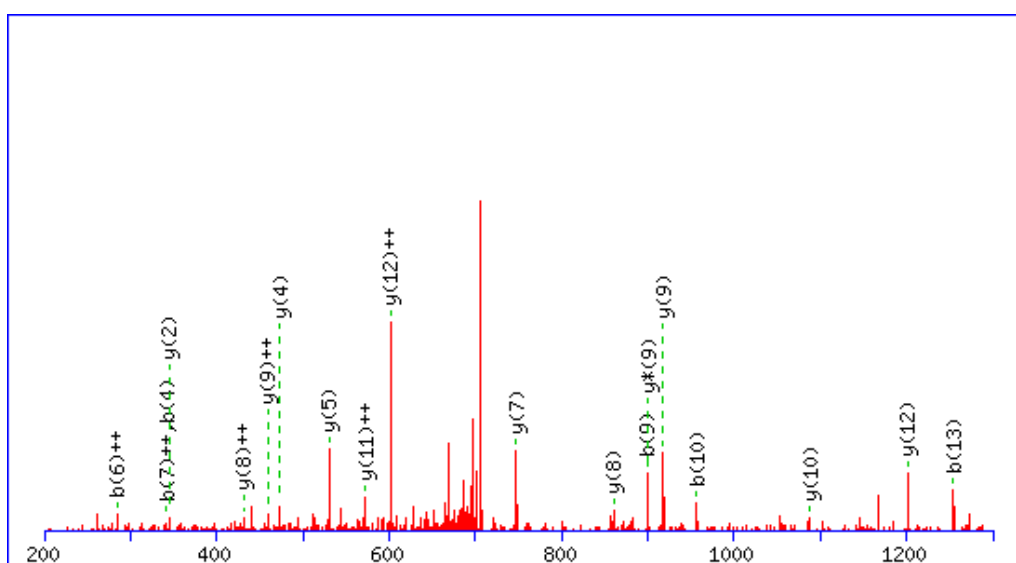

Fig. S4E

$\text{GK}_{(\text{CHD}2)_2}\text{GGK}_{(\text{CHD}2)_2}\text{GLGK}_{\text{Ac}}\text{GGAK}_{\text{Ac}}\text{R}$

Monoisotopic mass of neutral peptide Mr(calc): 1417.90

Variable modifications:

**K2:** Dimethyl:2H(4) (K); **K5:** Dimethyl:2H(4) (K); **K9:** Acetyl (K); **K13:** Acetyl (K)

Ions Score: 55    Expect: 8.5e-005

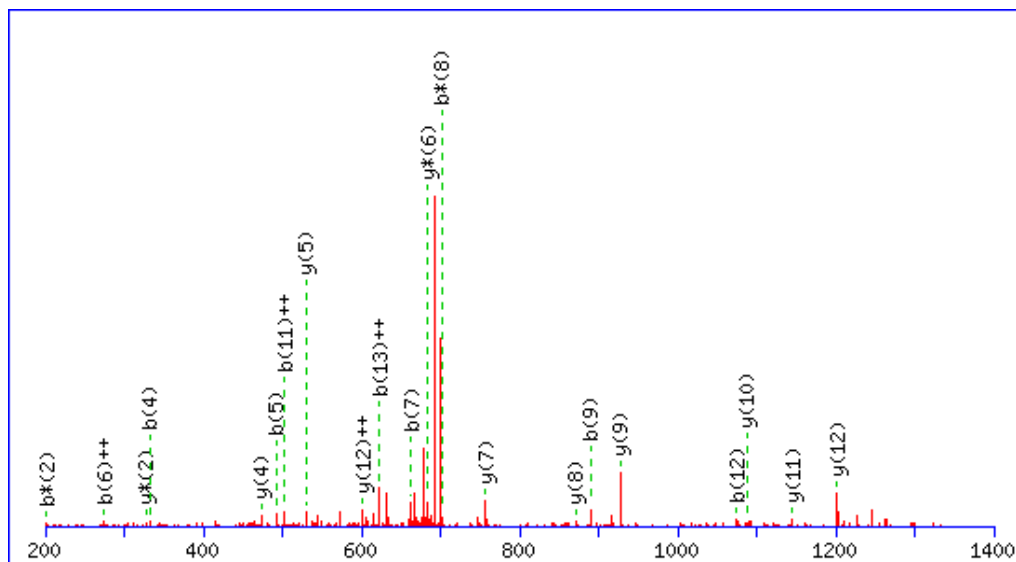

Fig. S4F

$\text{GK}_{(\text{CHD}2)_2}\text{GGK}_{\text{Ac}}\text{GLGK}_{(\text{CHD}2)_2}\text{GGAK}_{\text{Ac}}\text{R}$

Monoisotopic mass of neutral peptide Mr(calc): 1417.90

Variable modifications:

**K2:** Dimethyl:2H(4) (K); **K5:** Acetyl (K); **K9:** Dimethyl:2H(4) (K); **K13:** Acetyl (K)

Ions Score: 53    Expect: 0.00012

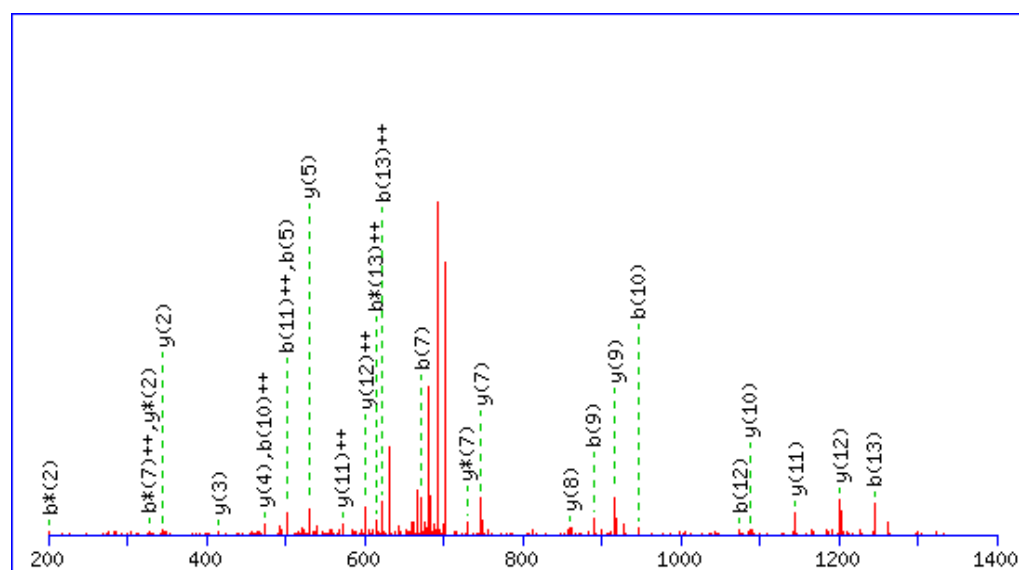

Fig. S4G

**GK<sub>Ac</sub>GGK<sub>(CHD2)2</sub>GLGK<sub>(CHD2)2</sub>GGAK<sub>Ac</sub>R**

Monoisotopic mass of neutral peptide Mr(calc): 1417.90

Variable modifications:

**K2:** Acetyl (K); **K5:** Dimethyl:2H(4) (K); **K9:** Dimethyl:2H(4) (K); **K13:** Acetyl (K)

Ions Score: 51    Expect: 0.0002

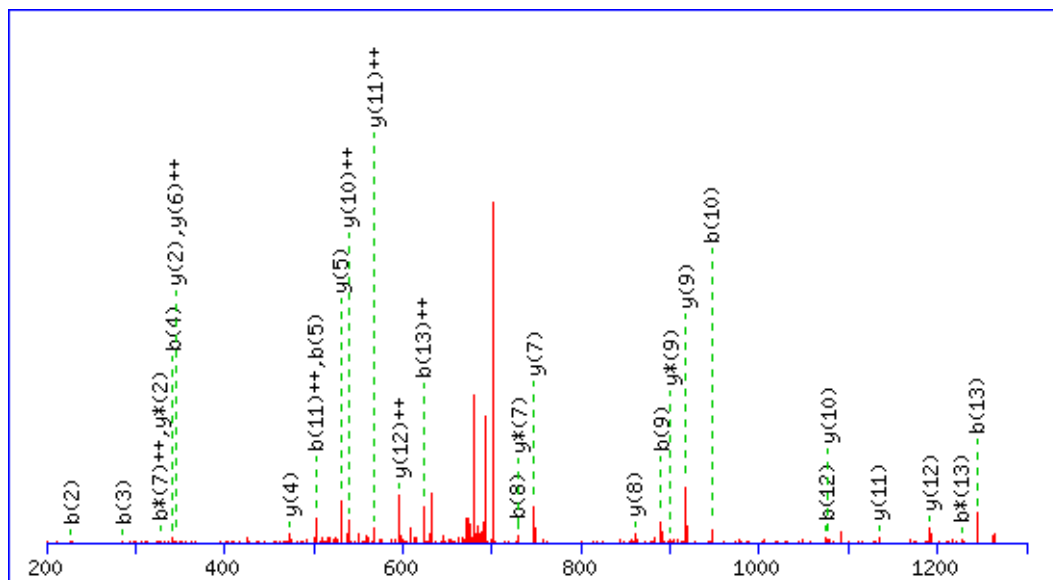

Fig. S4H

**GK<sub>(CHD2)2</sub>GGK<sub>(CHD2)2</sub>GLGK<sub>(CHD2)2</sub>GGAK<sub>Ac</sub>R**

Monoisotopic mass of neutral peptide Mr(calc): 1407.94

Variable modifications:

**K2:** Dimethyl:2H(4) (K); **K5:** Dimethyl:2H(4) (K); **K9:** Dimethyl:2H(4) (K); **K13:** Acetyl (K)

Ions Score: 49    Expect: 0.00042

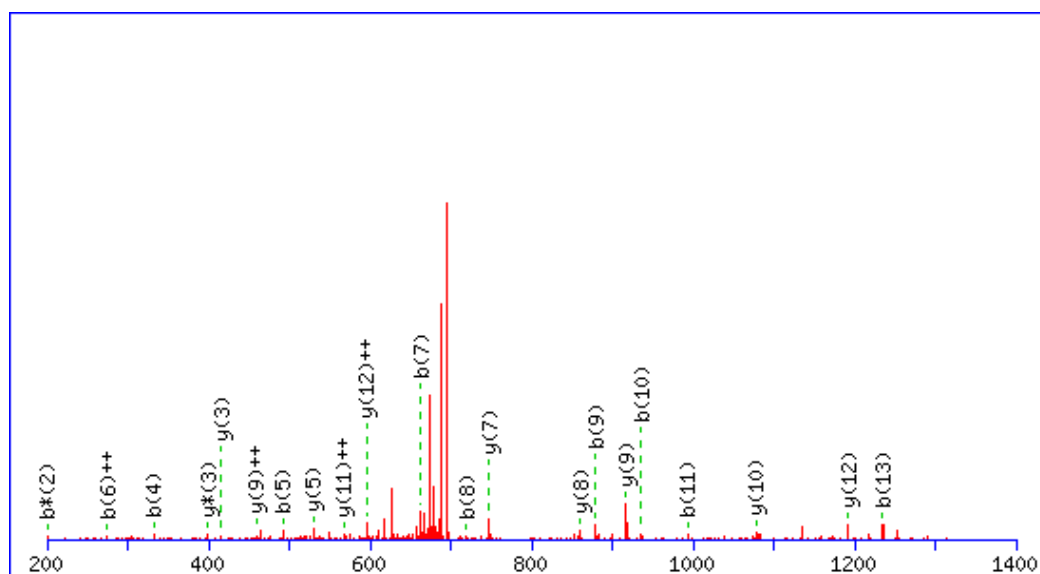

Fig. S4I

$\text{GK}_{(\text{CHD}2)_2}\text{GGK}_{(\text{CHD}2)_2}\text{GLGK}_{(\text{CHD}2)_2}\text{GGAK}_{(\text{CHD}2)_2}\text{R}$

Monoisotopic mass of neutral peptide Mr(calc): 1397.99

Variable modifications:

**K2:** Dimethyl:2H(4) (K); **K5:** Dimethyl:2H(4) (K); **K9:** Dimethyl:2H(4) (K); **K13:** Dimethyl:2H(4) (K)

Ions Score: 55    Expect: 8.1e-005

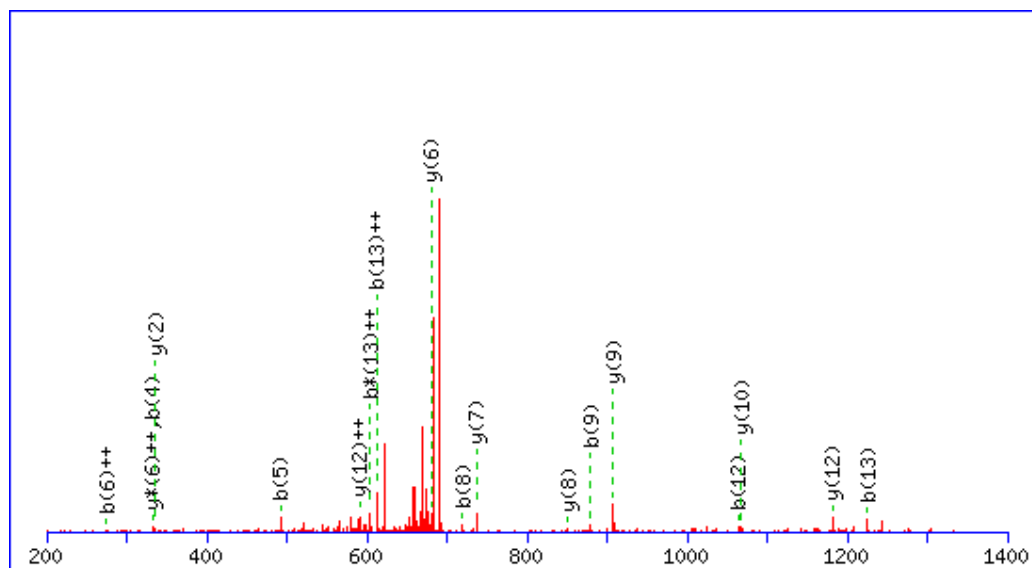

Fig. S4J

$\text{GK}_{(\text{CHD}2)_2}\text{GGK}_{(\text{CHD}2)_2}\text{GLGK}_{\text{Ac}}\text{GGAK}_{\text{Me}2}\text{R}_{\text{Me}}$

Monoisotopic mass of neutral peptide Mr(calc): 1417.93

Variable modifications:

**K2:** Dimethyl:2H(4) (K); **K5:** Dimethyl:2H(4) (K); **K9:** Acetyl (K); **K13:** Dimethyl (K); **R14:** Methyl (R)

Ions Score: 48    Expect: 0.00046

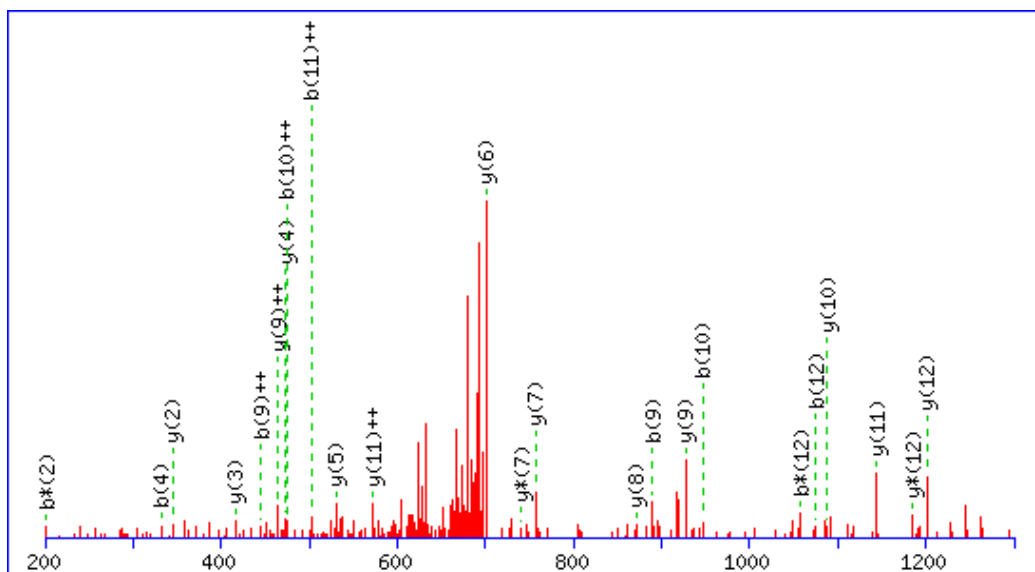



**Table S1** In-vitro dimethylation of several modified peptides from histone H3.

|          |             | <b>Peptide</b>                                                                                     | <b>Abundance</b> |
|----------|-------------|----------------------------------------------------------------------------------------------------|------------------|
| H3 9-17  | Identified  | K(CHD <sub>2</sub> ) <sub>2</sub> STGGK(CHD <sub>2</sub> ) <sub>2</sub> APR                        | 4.23E+04         |
|          | Theoretical | K, STGGK, APR                                                                                      |                  |
|          | Identified  | K(Me <sub>2</sub> )STGGK(CHD <sub>2</sub> ) <sub>2</sub> APR                                       | 8.76E+05         |
|          | Theoretical | K(Me <sub>2</sub> )STGGK, APR                                                                      |                  |
|          | Identified  | K(Me <sub>2</sub> )STGGK(Ac)APR                                                                    | 1.13E+06         |
|          | Theoretical | K(Me <sub>2</sub> )STGGK(Ac)APR                                                                    |                  |
| H3 18-26 | Identified  | K(CHD <sub>2</sub> ) <sub>2</sub> QLATK(CHD <sub>2</sub> ) <sub>2</sub> AAR                        | 6.96E+06         |
|          | Theoretical | K, QLATK, AAR                                                                                      |                  |
|          | Identified  | K(CHD <sub>2</sub> ) <sub>2</sub> QLATK(Ac)AAR                                                     | 1.28E+06         |
|          | Theoretical | K, QLATK(Ac)AAR                                                                                    |                  |
|          | Identified  | K(Ac)QLATK(Ac)AAR                                                                                  | 2.05E+07         |
|          | Theoretical | K(Ac)QLATK(Ac)AAR                                                                                  |                  |
| H3 27-40 | Identified  | K(Me <sub>2</sub> )SAPATGGVK(Me <sub>2</sub> )K(CHD <sub>2</sub> ) <sub>2</sub> PHR                | 1.56E+07         |
|          | Theoretical | K(Me <sub>2</sub> )SAPATGGVK(Me <sub>2</sub> )K, PHR                                               |                  |
|          | Identified  | K(Me <sub>2</sub> )SAPATGGVK(CHD <sub>2</sub> ) <sub>2</sub> K(CHD <sub>2</sub> ) <sub>2</sub> PHR | 4.92E+04         |
|          | Theoretical | K(Me <sub>2</sub> )SAPATGGVK, K, PHR                                                               |                  |

**Table S2** Ratios of heavy/light dimethylation of H4 peptides (The highlighted N-terminal residue was heavy or light dimethylated).

| Peptide                                                                                                                                            | Abundance(H) | Abundance(L) | Ratio(H/L) |
|----------------------------------------------------------------------------------------------------------------------------------------------------|--------------|--------------|------------|
| GK(Ac)GGK(Ac)GLGK(Ac)GGAK(Ac)R                                                                                                                     | 7.10E+05     | 7.23E+05     | 0.9820     |
| GK(CHD <sub>2</sub> ) <sub>2</sub> GGK(Ac)GLGK(Ac)GGAK(Ac)R                                                                                        | 3.03E+06     | 2.96E+06     | 1.0236     |
| GK(Ac)GGK(CHD <sub>2</sub> ) <sub>2</sub> GLGK(Ac)GGAK(Ac)R                                                                                        | 1.50E+06     | 1.49E+06     | 1.0067     |
| GK(Ac)GGK(Ac)GLGK(CHD <sub>2</sub> ) <sub>2</sub> GGAK(Ac)R                                                                                        | 2.83E+05     | 2.80E+05     | 1.0107     |
| GK(CHD <sub>2</sub> ) <sub>2</sub> GGK(CHD <sub>2</sub> ) <sub>2</sub> GLGK(Ac)GGAK(Ac)R                                                           | 1.97E+06     | 2.01E+06     | 0.9801     |
| GK(CHD <sub>2</sub> ) <sub>2</sub> GGK(Ac)GLGK(CHD <sub>2</sub> ) <sub>2</sub> GGAK(Ac)R                                                           | 1.27E+06     | 1.22E+06     | 1.0410     |
| GK(Ac)GGK(CHD <sub>2</sub> ) <sub>2</sub> GLGK(CHD <sub>2</sub> ) <sub>2</sub> GGAK(Ac)R                                                           | 1.04E+06     | 1.06E+06     | 0.9811     |
| GK(CHD <sub>2</sub> ) <sub>2</sub> GGK(CHD <sub>2</sub> ) <sub>2</sub> GLGK(CHD <sub>2</sub> ) <sub>2</sub> GGAK(Ac)R                              | 6.52E+05     | 6.48E+05     | 1.0062     |
| GK(CHD <sub>2</sub> ) <sub>2</sub> GGK(CHD <sub>2</sub> ) <sub>2</sub> GLGK(CHD <sub>2</sub> ) <sub>2</sub> GGAK(CHD <sub>2</sub> ) <sub>2</sub> R | 6.40E+04     | 6.50E+04     | 0.9846     |
| DAVYTEHAK(CHD <sub>2</sub> ) <sub>2</sub> R                                                                                                        | 2.10E+06     | 2.07E+06     | 1.0144     |
| KTVTAMDVVYALK(CHD <sub>2</sub> ) <sub>2</sub> R                                                                                                    | 2.94E+04     | 3.07E+04     | 0.9577     |
| TLYGFGG                                                                                                                                            | 5.20E+07     | 5.26E+07     | 0.9886     |
| DNIQGTK(CHD <sub>2</sub> ) <sub>2</sub> PAIR                                                                                                       | 3.06E+05     | 2.81E+05     | 1.0890     |
| ISGLIYEETR                                                                                                                                         | 7.02E+07     | 6.41E+07     | 1.0952     |
| GVLK(CHD <sub>2</sub> ) <sub>2</sub> VFLENVIR                                                                                                      | 7.72E+04     | 6.75E+04     | 1.1437     |
| VFLENVIR                                                                                                                                           | 1.09E+07     | 1.25E+07     | 0.8720     |

Fig.S5 MS/MS spectra for the N-terminal heavy dimethylated peptides in Fig. 5.

Fig. S5a

(CHD2)2-GK<sub>(CHD2)2</sub>G GK<sub>(CHD2)2</sub>GLGK<sub>(CHD2)2</sub>GGAK<sub>Ac</sub>R

Monoisotopic mass of neutral peptide Mr(calc): 1440.00

Variable modifications:

N-term: Dimethyl:2H(4) (N-term)

K2: Dimethyl:2H(4) (K); K5: Dimethyl:2H(4) (K); K9: Dimethyl:2H(4) (K); K13 : Acetyl (K)

Ions Score: 54 Expect:0.00025

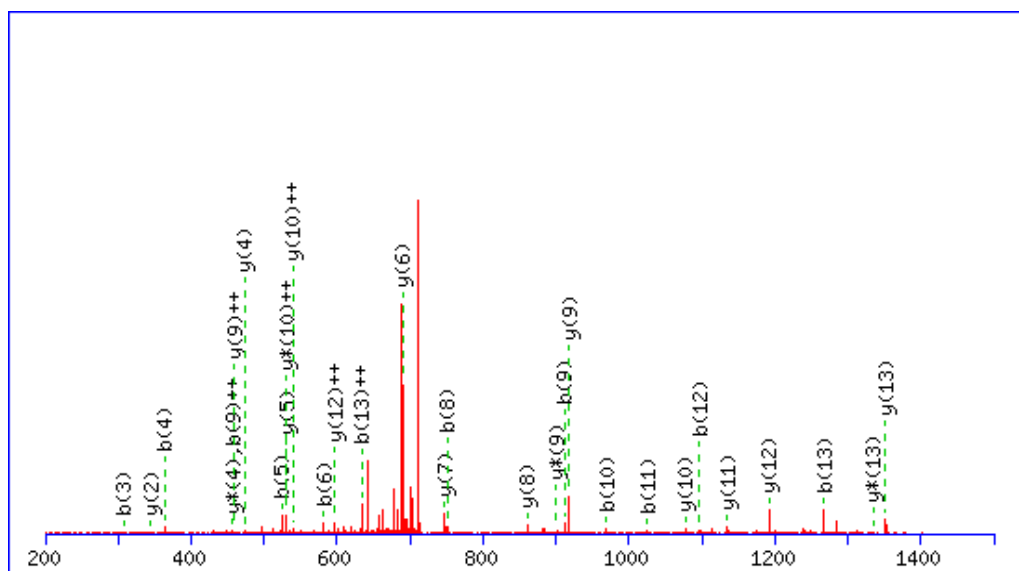

Fig. S5b

(CHD2)2-GK<sub>Ac</sub>G GK<sub>(CHD2)2</sub>GLGK<sub>Ac</sub>GGAK<sub>Ac</sub>R

Monoisotopic mass of neutral peptide Mr(calc): 1459.91

Variable modifications:

N-term: Dimethyl:2H(4) (N-term); K2:Acetyl (K); K5: Dimethyl:2H(4) (K); K9: Acetyl (K); K13: Acetyl (K)

Ions Score: 57 Expect: 0.00012

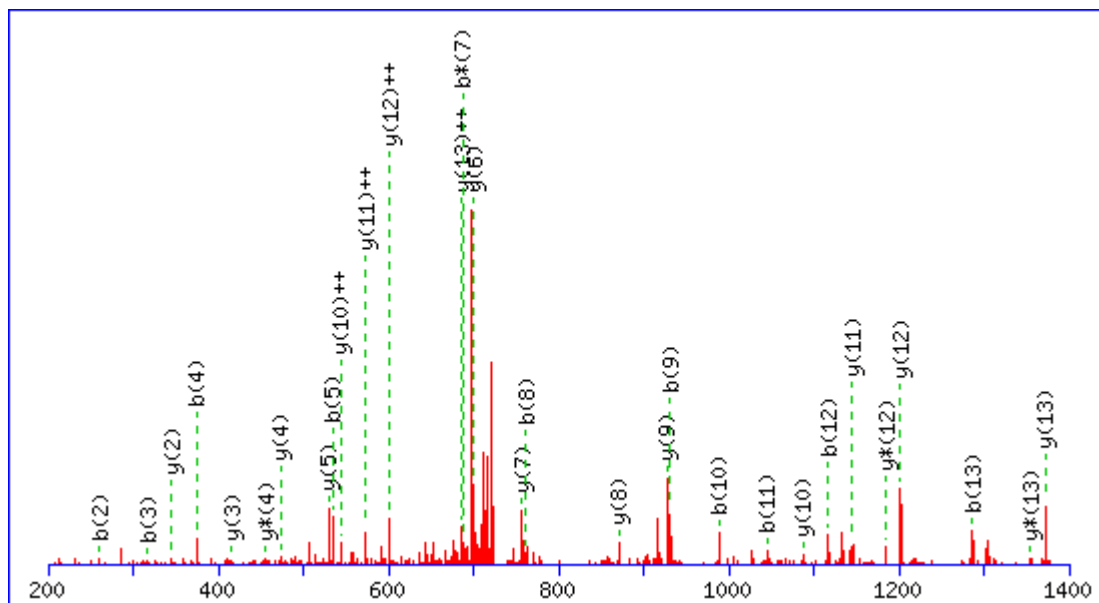

Fig. S5c

(CHD2)2-DAVTYTEHAK(CHD2)2R

Monoisotopic mass of neutral peptide Mr(calc): 1353.75

Variable modifications:

N-term: Dimethyl:2H(4) (N-term); **K10**: Dimethyl:2H(4) (K)

Ions Score: 42    Expect: 0.0038

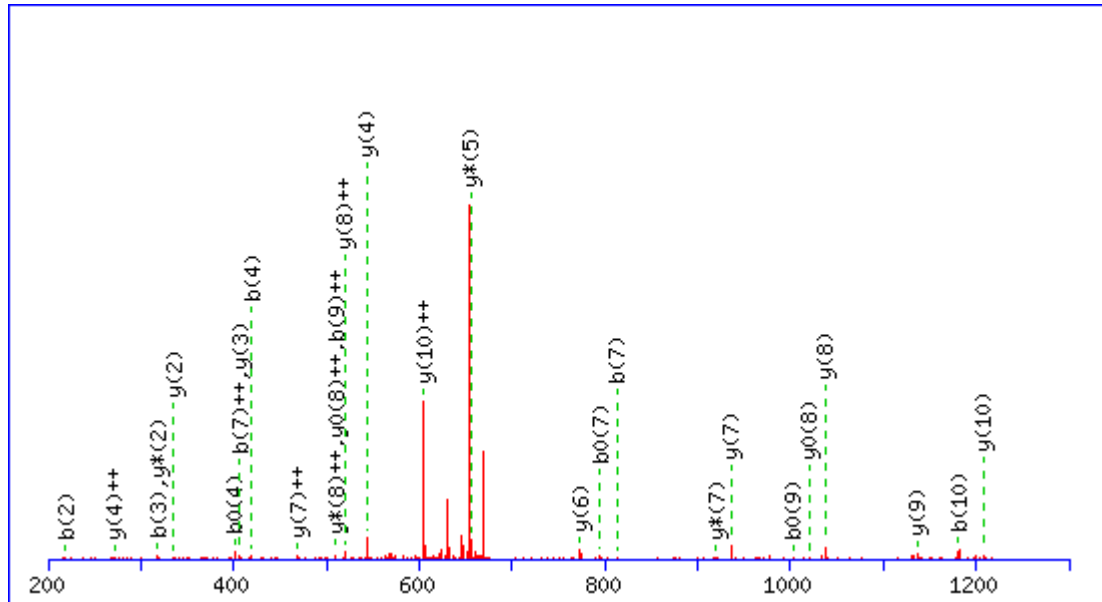

**Fig.S6** Matched peptides of histone H3.2 (shown in bold red) before (A) and after (B) isotope dimethyl labeling. Matched peptides of histone H4 (shown in bold red) before (C) and after (D) isotope dimethyl labeling.

- A** Match to: **gi|31742503** Score: **13767**  
**histone H3.2 [Homo sapiens]**  
Sequence Coverage: **60%**  
Matched peptides shown in **Bold Red**
- ```

1 ARTKQTARKS TGGKAPRKQL ATKAARKSAP ATGGVKKPHR YRPGTVALRE
51 IRRYQKSTEL LIRKLPFQRL VREIAQDFKT DLRFQSSAVM ALQEASEAYL
101 VGLFEDTNLC AIHAKRVTIM PKDIQLARRI RGERA

```
- B** Match to: **gi|31742503** Score: **7232**  
**histone H3.2 [Homo sapiens]**  
Sequence Coverage: **88%**  
Matched peptides shown in **Bold Red**
- ```

1 ARTKQTARKS TGGKAPRKQL ATKAARKSAP ATGGVKKPHR YRPGTVALRE
51 IRRYQKSTEL LIRKLPFQRL VREIAQDFKT DLRFQSSAVM ALQEASEAYL
101 VGLFEDTNLC AIHAKRVTIM PKDIQLARRI RGERA

```
- C** Match to: **gi|28173560** Score: **22915**  
**histone H4 [Homo sapiens]**  
Sequence Coverage: **75%**  
Matched peptides shown in **Bold Red**
- ```

1 SGRGKGGKGL GKGGAKRHRK VLRDNIQGIT KPAIRRLARR GGVKRISGLI
51 YEETRGLKV FLENVIRDAV TYTEHAKRKT VTAMDVVYAL KRQGRITLYGF
101 GG

```
- D** Match to: **gi|28173560** Score: **17487**  
**histone H4 [Homo sapiens]**  
Sequence Coverage: **91%**  
Matched peptides shown in **Bold Red**
- ```

1 SGRGKGGKGL GKGGAKRHRK VLRDNIQGIT KPAIRRLARR GGVKRISGLI
51 YEETRGLKV FLENVIRDAV TYTEHAKRKT VTAMDVVYAL KRQGRITLYGF
101 GG

```
